# Supplementary material for: Synthesis and characterization of new ferrocene peptide conjugates
Source: Royal Society of Chemistry journal article supplement (doi:10.1039/b817670a), 2009-01-01
Supplement: b817670a.pdf [file b817670a.pdf]

## Synthesis and Characterization of New Ferrocene Peptide Conjugates

### Supplementary Information

Cailin Drexler, Mark Milne, Erin Morgan, Michael Jenkins, H-B. Kraatz

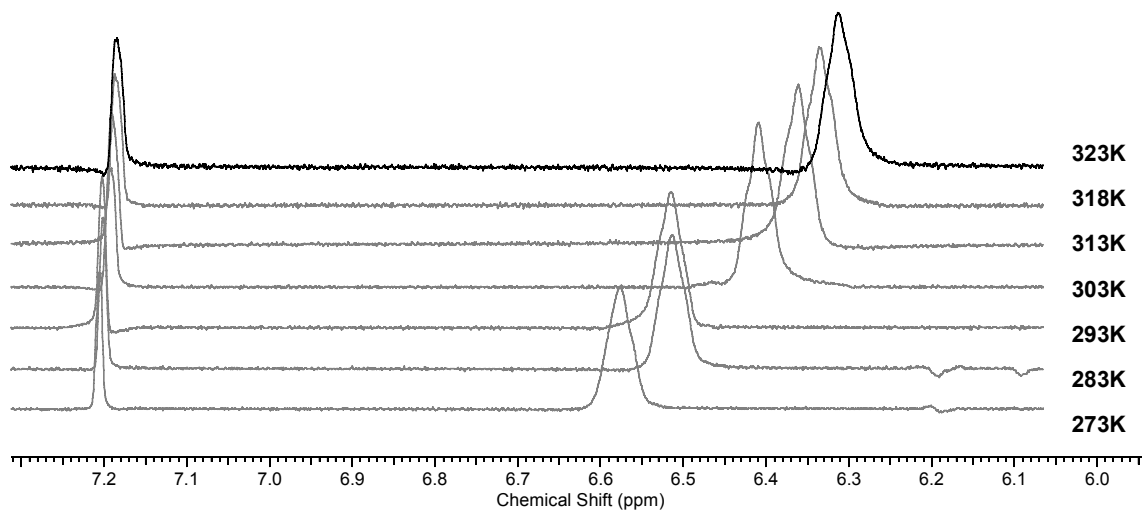

**Figure S1** Variable temperature <sup>1</sup>H-NMR stack plots of compound **2** displaying the amide region in CDCl<sub>3</sub> from 273-323K.

**Figure S2** Amide protons of compound **2** upfield shift with increasing temperature, giving a temperature coefficient of  $-5.2 \text{ ppb K}^{-1}$ .

**Figure S3** FT-IR spectrum of compound **6**, showing the amide A (3000-3500  $\text{cm}^{-1}$ ) regions.

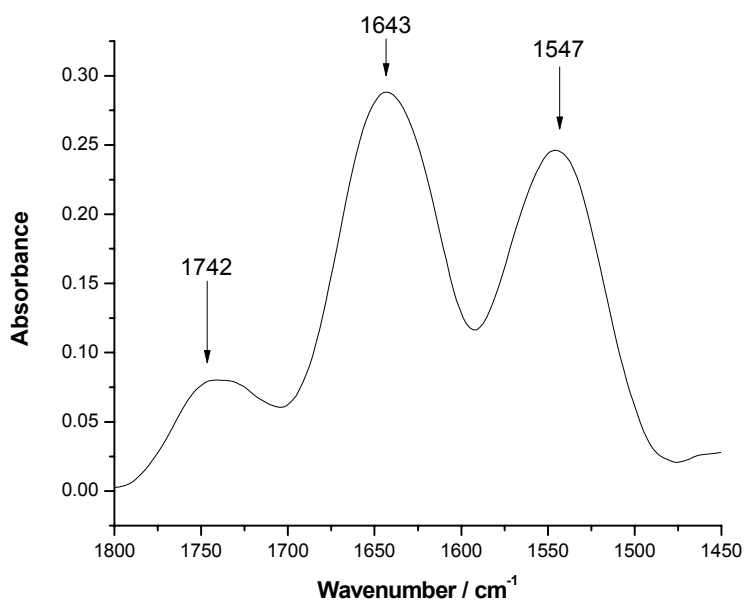

**Figure S4** FT-IR spectrum of compound **6**, showing the amide I, amide II (1500-1800  $\text{cm}^{-1}$ ) and methyl ester carbonyl absorption.

**Figure S5** CD spectrum of compound **7** displaying a positive Cotton effect at 483 nm, indicating *P*-helicity of the Fc core.

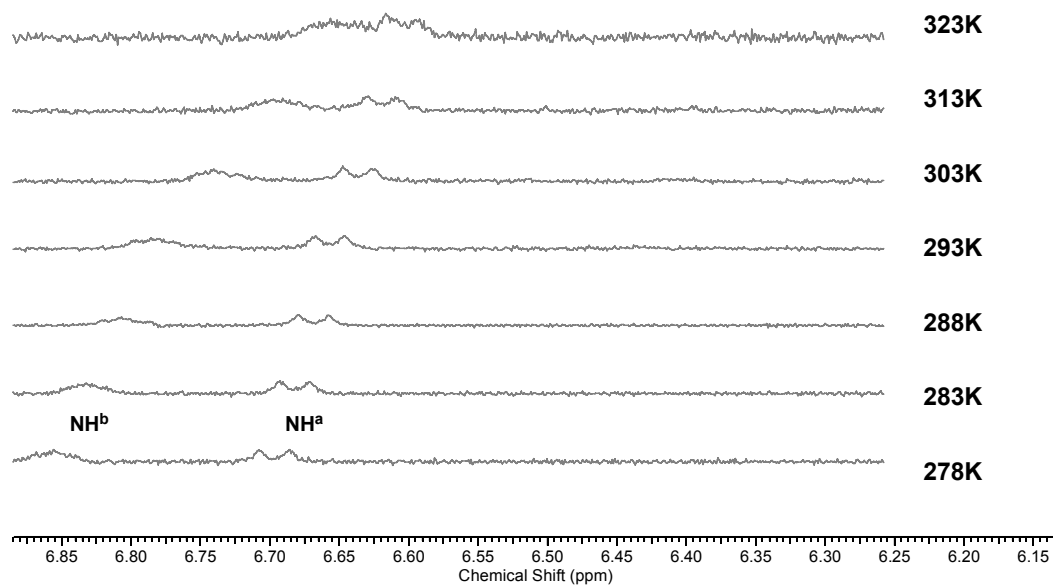

**Figure S6** Variable temperature <sup>1</sup>H-NMR stack plots of compound **8**, displaying the amide region in CDCl<sub>3</sub> from 278-323K.

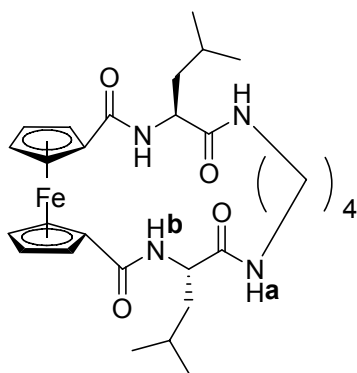

**Scheme S1** Labelling scheme for amide protons of compound **8**.

**Figure S7** Amide protons of compound **8** upfield shift with increasing temperature. Corresponding to Scheme S1,  $\text{NH}^a$  (circle data points) and  $\text{NH}^b$  (square data points) have temperature coefficients of  $-2.15 \text{ ppb K}^{-1}$  and  $-4.67 \text{ ppb K}^{-1}$ , respectively.

**Figure S8** Concentration dependence of the amide protons of compound **8** with varying concentration. Corresponding to Scheme S1,  $\text{NH}^{\text{a}}$  are the circle data points and  $\text{NH}^{\text{b}}$  are the square data points.

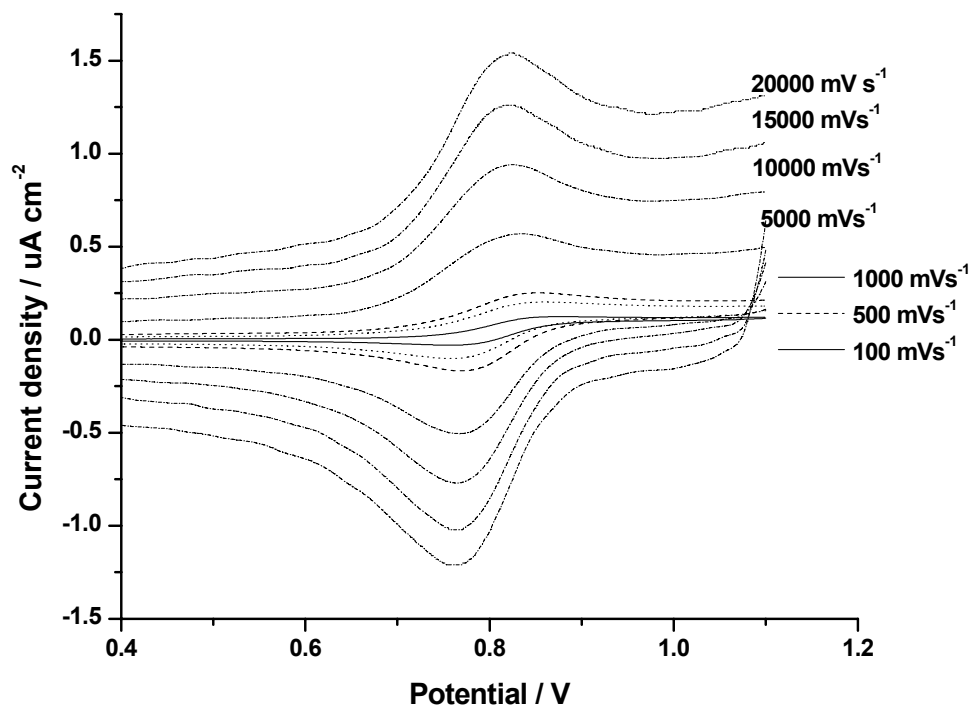

**Figure S9** Representative cyclic voltammogram of compounds **1-7**, with **7** shown here. Scan rate was varied from 100  $\text{mV s}^{-1}$  to 20000  $\text{mV s}^{-1}$ .

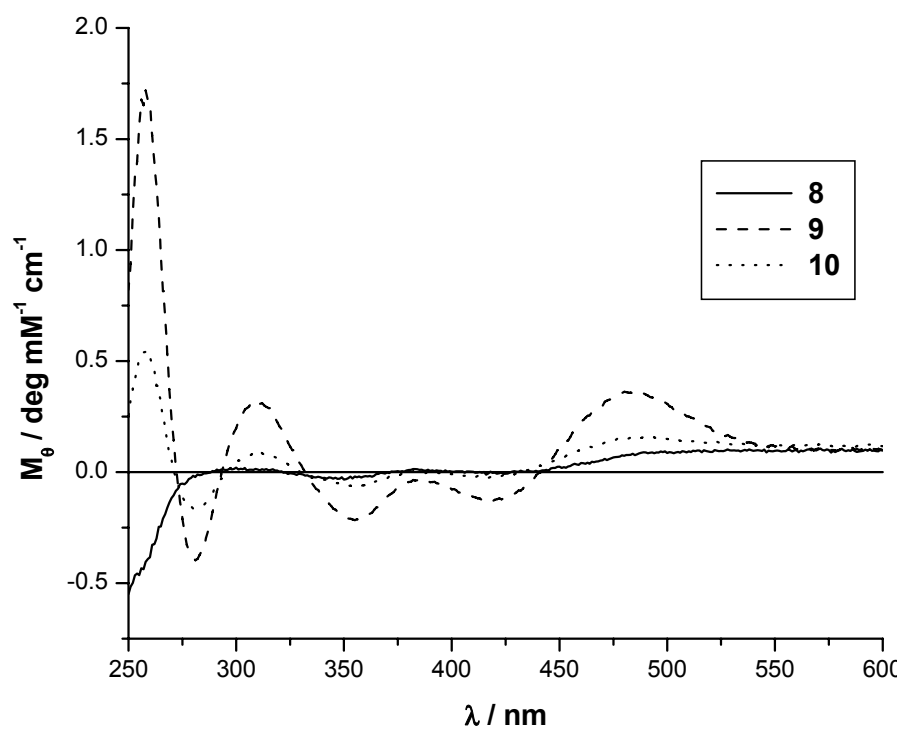

Figure S10 CD spectra of compounds **8** – **10** (0.2 mM, CH<sub>2</sub>Cl<sub>2</sub>)

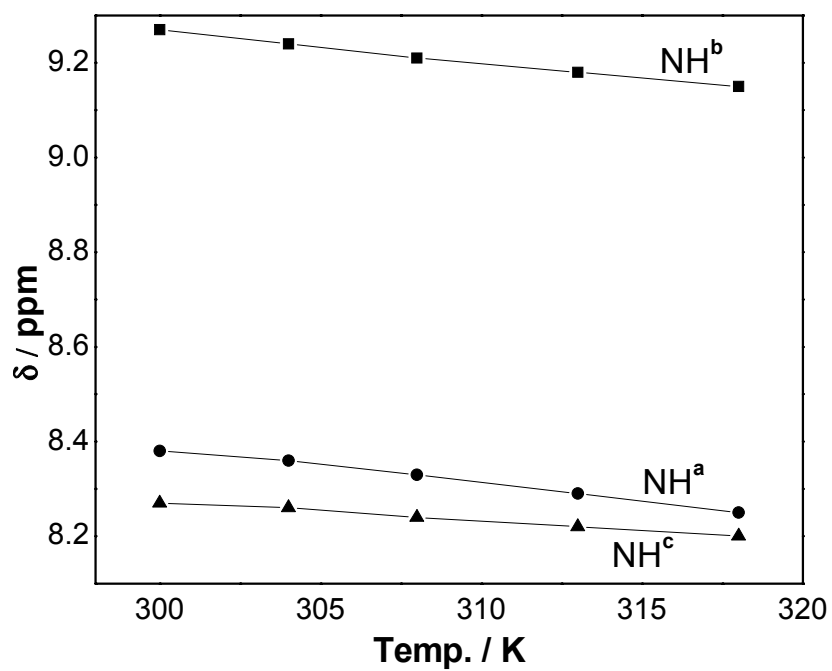

**Figure S11:** Temperature dependence of amides NHs of compound **6**. The diamine linker NH<sup>a</sup> and Gly NH<sup>b,c</sup> protons shift upfield with increasing temperature (with circles, squares and triangle labels, respectively)

**Table S1** Selected Spectroscopic data for Fc conjugates **1 – 10**

| Compound  | <sup>1</sup> H-NMR<br>δ / ppm |                 |                 |              | <sup>13</sup> C-NMR<br>δ / ppm |                  |                      | FT-IR<br>cm <sup>-1</sup> |            |                      |             |
|-----------|-------------------------------|-----------------|-----------------|--------------|--------------------------------|------------------|----------------------|---------------------------|------------|----------------------|-------------|
|           | NH <sup>a</sup>               | NH <sup>b</sup> | NH <sup>c</sup> | αH           | C=O <sub>Fc</sub>              | C=O <sub>R</sub> | C=O <sub>ester</sub> | Amide<br>A                | Amide<br>I | C=O <sub>ester</sub> | Amide<br>II |
| <b>1</b>  | 7.14                          | n/a             | n/a             | n/a          | 169.8                          | n/a              | 172.1                | 3328                      | 1629       | 1716                 | 1531        |
| <b>2</b>  | 6.48                          | n/a             | n/a             | n/a          | 169.5                          | n/a              | 172.2                | 3313                      | 1628       | 1715                 | 1540        |
| <b>3</b>  | 6.31                          | n/a             | n/a             | n/a          | 169.4                          | n/a              | 172.1                | 3335                      | 1627       | 1713                 | 1537        |
| <b>4</b>  | 6.19                          | n/a             | n/a             | n/a          | 169.2                          | n/a              | 172.2                | 3338                      | 1628       | 1713                 | 1539        |
| <b>5</b>  | 6.14                          | n/a             | n/a             | n/a          | 169.2                          | n/a              | 172.2                | 3398                      | 1637       | 1717                 | 1532        |
| <b>6</b>  | 8.34                          | 9.23            | 8.26            | 4.08<br>3.86 | 169.5                          | 173.8            | 171.2                | 3298                      | 1643       | 1742                 | 1547        |
| <b>7</b>  | 8.55                          | 8.97            | 7.95            | 4.82<br>4.95 | 170.0                          | 175.9            | 171.1                | 3289                      | 1636       | 1732                 | 1543        |
| <b>8</b>  | 7.06                          | 6.62            | n/a             | 4.52         | 171.4                          | 172.8            | n/a                  | 3310                      | 1638       | n/a                  | 1528        |
| <b>9</b>  | 7.38<br>7.25                  | 7.15<br>7.00    | n/a             | 4.55         | 170.7                          | 172.6            | n/a                  | 3289                      | 1638       | n/a                  | 1528        |
| <b>10</b> | 6.94<br>6.88                  | 6.74<br>6.46    | n/a             | 4.68         | 170.5                          | 172.2            | n/a                  | 3292                      | 1639       | n/a                  | 1533        |



Electronic Supplementary Information for Dalton Transactions  
This journal is © The Royal Society of Chemistry 2009
